# Supplementary material
Source: Copernicus journal article supplement (doi:10.5194/gmd-19-5173-2026)
Supplement: Supplementary file [file gmd-19-5173-2026-supplement-title-page.pdf › gmd-19-5173-2026-supplement-title-page.pdf]

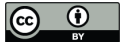

## *Supplement of*

# **G&M3D 1.0: an interactive framework for 3D model construction and forward calculation of potential fields**

**Dengkang Wang et al.**

*Correspondence to:* Bo Chen (bochen@csu.edu.cn)

- gmd-19-5173-2026-supplement-title-page.pdf
- SaltDome70x70x50.bin
- Software instruction manual\_v3.docx
- Software instruction manual\_v3.pdf
- ThomasModel100x100x100.bin
- background.jpg
- build\_custom\_property\_example.bat
- custom\_property\_example.cpp
- gm3d\_custom\_property.dll
- gm3d\_custom\_property.lib
- libgm3d\_custom\_property.so
- maual\_Model.bin
- salldome\_gravity\_forward\_data\_spatial domain.txt
- saltdome\_gravity\_forward\_data\_G&M3D.txt
- sphereGraFWD\_800x800\_absDiff\_G\_mGal.txt
- sphereGraFWD\_800x800\_analytic\_G\_mGal.txt
- sphereGraFWD\_800x800\_bce\_G\_mGal.txt
- sphereGraFWD\_800x800\_relDiff\_G\_percent.txt
- sphereGraFWD\_800x800\_x\_m.txt
- sphereGraFWD\_800x800\_y\_m.txt

- sphereMagFWD\_800x800\_absDiff\_T\_nT.txt
- sphereMagFWD\_800x800\_analytic\_T\_nT.txt
- sphereMagFWD\_800x800\_bce\_T\_nT.txt
- sphereMagFWD\_800x800\_relDiff\_T\_percent.txt
- sphereMagFWD\_800x800\_x\_m.txt
- sphereMagFWD\_800x800\_y\_m.txt
- tenModels.bin
- topo.txt

The copyright of individual parts of the supplement might differ from the article licence.
